# Supplementary material for: MicroRNA-1246 Inhibits NFATc1 Phosphorylation and Regulates T Helper 17 Cell Activation in the Pathogenesis of Severe Alopecia Areata
Source: PubMed Central journal article supplement — Ann Dermatol. 2023 Jan 20;35(1):46–55. doi: 10.5021/ad.22.126 (PMC9905862; doi:10.5021/ad.22.126), 2023-01-20
Supplement: ad-35-46-s001.pdf [file ad-35-46-s001.pdf]

**Supplementary Table 1.** Primer sequences

| Primer name        | Sequences (5'-3')                                 |
|--------------------|---------------------------------------------------|
| NFATc1-hF          | GAAACTCCGACATTGAACT                               |
| NFATc1-hR          | CAGACAGGACCATCTTCTT                               |
| DYRK1A-hF          | GATATGTGGTCCCTCGGGTGT                             |
| DYRK1A-hR          | CGGGTTCCTGGTGGTTTGT                               |
| hsa-miRNA-1246-hF  | GTCGTATCCAGTGCAGGGTCCGAGGTATTCGCACTGGATACGACCTGCT |
| hsa-miRNA-1246-hR  | GAGCGCAATGGATTTTTGGGTGCAGGGTCCGAGGT               |
| IL-17-hF           | ACAACCGATCCACCTCACCTT                             |
| IL-17-hR           | CAGCCCACGGACACCAGTA                               |
| ROR- $\gamma$ t-hF | CTGTAACGCGGCCTACTCCT                              |
| ROR- $\gamma$ t-hR | GGCTGTCCCTCTGCTTCTTG                              |
| U6-hF              | CTCGCTTCGGCAGCACA                                 |
| U6-hR              | AACGCTTACGAATTTGCGT                               |
| GAPDH-hF           | TGACAACTTTGGTATCGTGGAAGG                          |
| GAPDH-hR           | AGGCAGGGATGATGTTCTGGAGAG                          |

NFAT: nuclear factor of activated T cells, DYRK1A: dual-specific tyrosine phosphorylation-regulated kinase 1A, miRNA: microRNA, IL-17: interleukin 17, ROR- $\gamma$ t: retineic-acid-receptor-related orphan nuclear receptor gamma, GAPDH: glyceraldehyde-3-phosphate dehydrogenase.
